# Supplementary material
Source: PubMed Central journal article supplement (PMC3727146)
Supplement: NIHMS468310-supplement-Supporting_Information.pdf [file NIHMS468310-supplement-Supporting_Information.pdf]

# On the dynamics of fragment isomerization in collision-induced dissociation of peptides

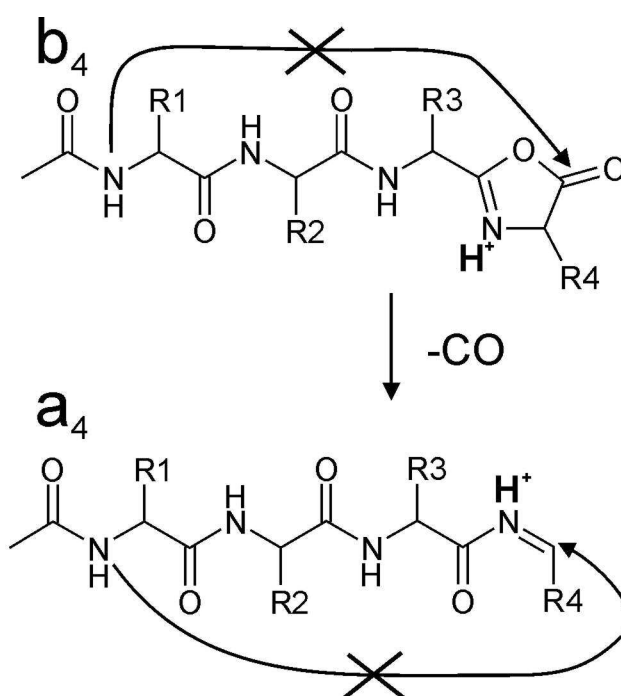

**Scheme S1.** Reaction scheme illustrating how the protection of the N-terminus with an acetyl group prevents formation of cyclic structures for  $b_4$  and  $a_4$ . The favored sites of proton attachment are indicated.

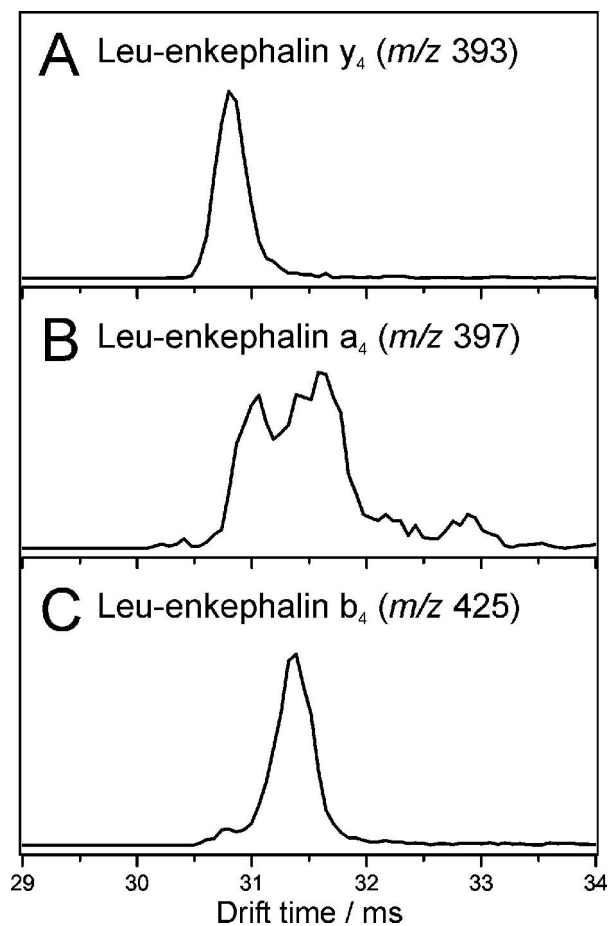

**Figure S2.** Drift time distributions of the most abundant CID fragment ions of protonated Leu-enkephalin: (A)  $y_4$ , (B)  $a_4$  and (C)  $b_4$ . (230 V activation energy)

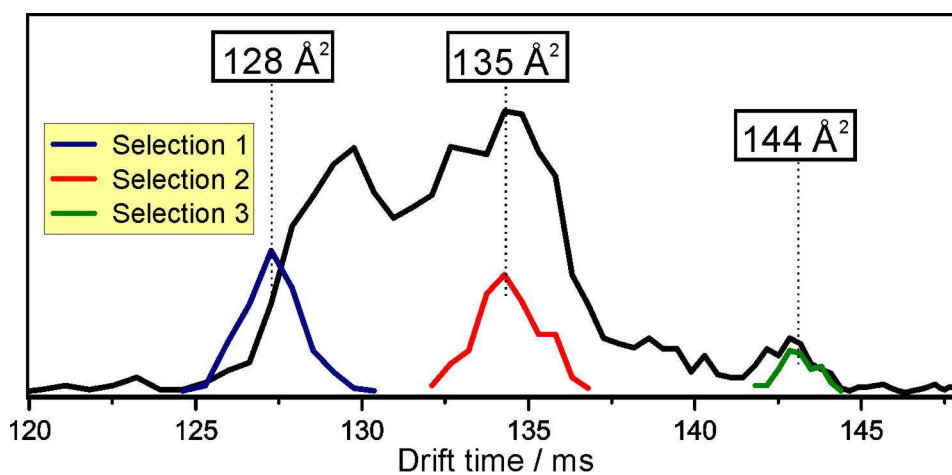

**Figure S3.** Drift time distributions for  $a_4$  (same as Fig S2 B) and for mobility selections of  $a_4$  at the end of the second drift tube. The experimentally derived collision cross sections are indicated. Note that the intensities of the mobility selections are multiplied by a factor of 20.

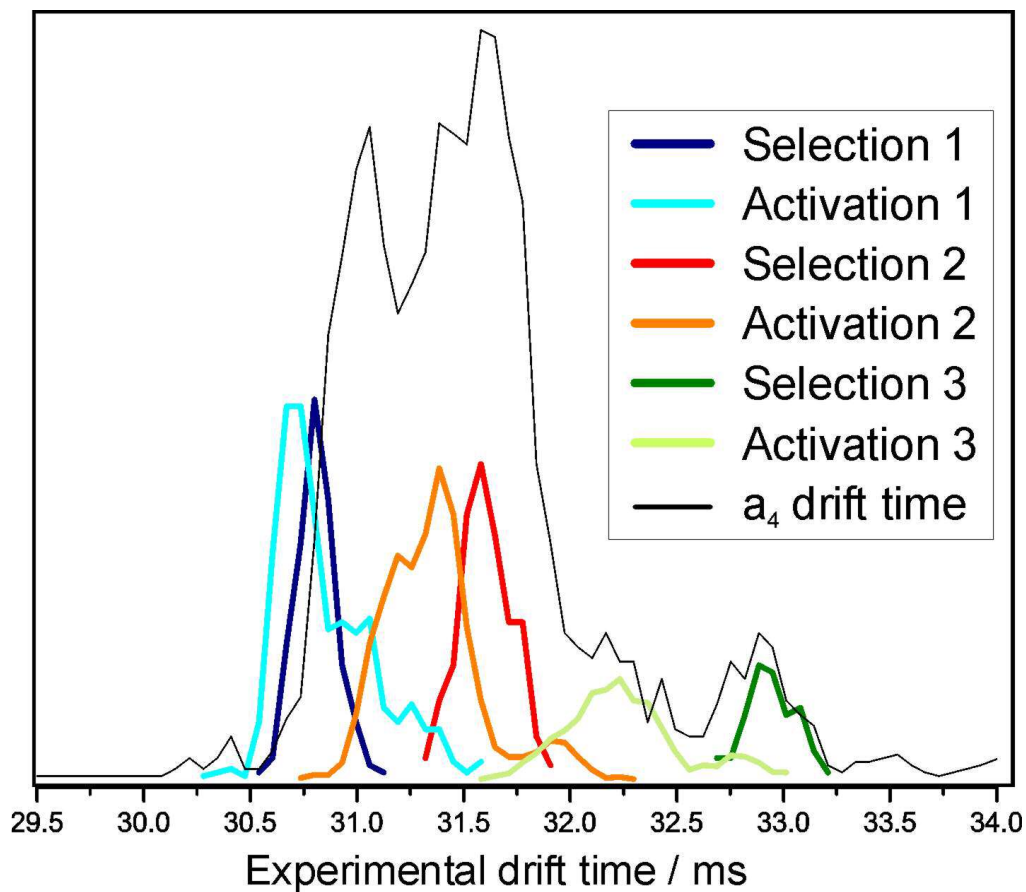

**Figure S4.** Drift time distributions of mobility-selected ions prior to and after collisional activation. The drift time distribution of the whole  $a_4$  distribution is indicated with a fine line as a reference.
